# Supplementary material for: Genetic Variation in theIL-6andHLA-DQB1Genes Is Associated with Spontaneous Clearance of Hepatitis C Virus Infection
Source: Hindawi journal article supplement (doi:10.1155/2016/6530436), 2016-01-01
Supplement: f1 [file 6530436.f1.pdf]

**Supplemental**

**Supplementary Figure 1.** Quantile-quantile plots of the test statistics of 309,470 null SNPs before (left) and after (right) correction for population genetic structure using the first ancestry eigenvector.

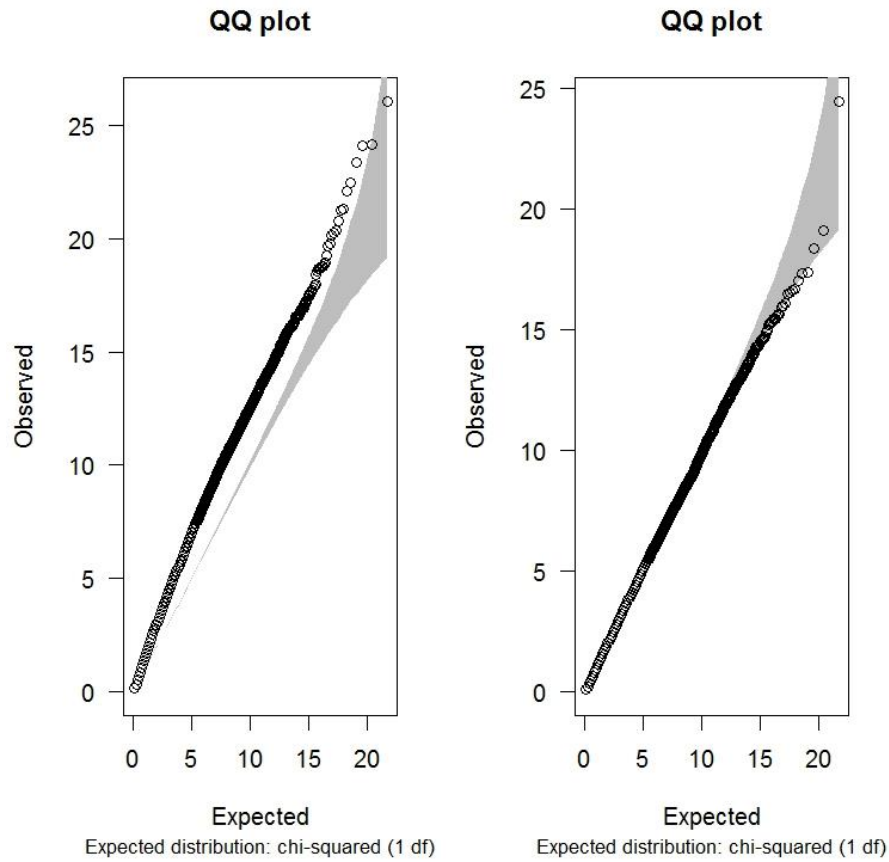



(C) IFNG, SOCS3

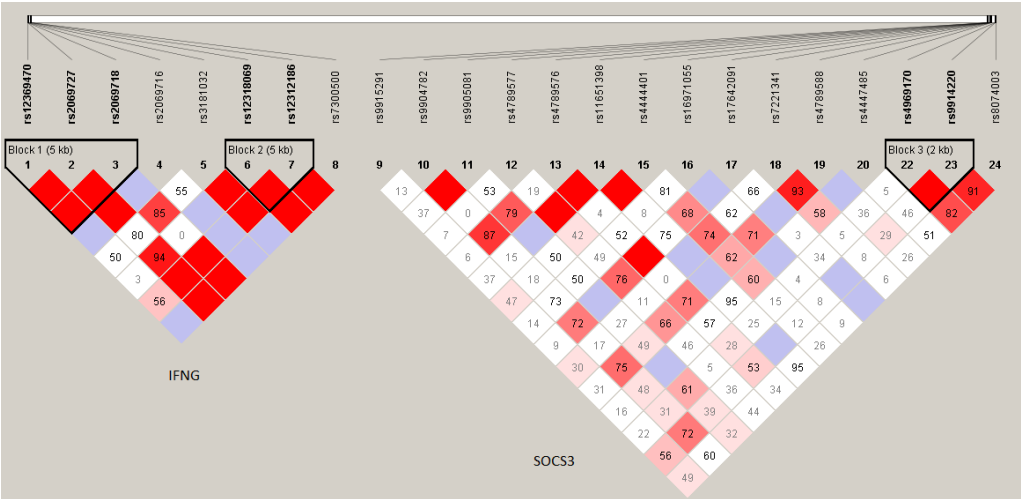

(D) IL18, CTLA4

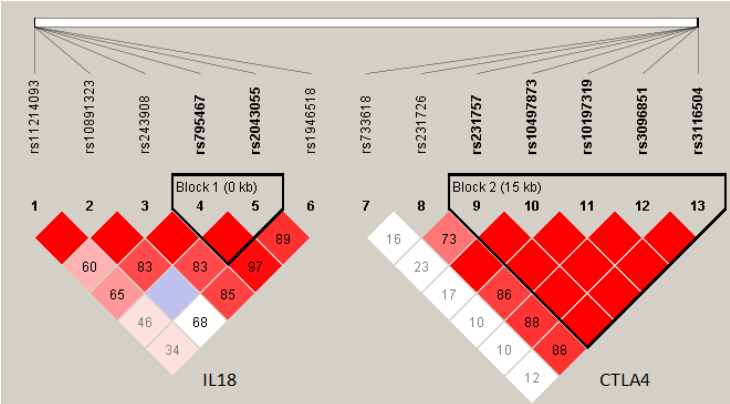



**Supplementary Table 1A. Genotype counts and frequencies of SNPs within HLA-DQB1**

| SNP       | Alleles                   | Spontaneous Resolution<br>n = 62           | Chronic HCV Infection<br>n = 95          | Logistic Regression Unadjusted p-value |
|-----------|---------------------------|--------------------------------------------|------------------------------------------|----------------------------------------|
| rs1063355 | AA<br>Aa<br>aa<br>missing | 22 (35%)<br>31 (50%)<br>9 (15%)<br>0       | 50 (53%)<br>37 (39%)<br>8 (8%)<br>0      | 0.6112                                 |
| rs9275141 | AA<br>Aa<br>aa<br>missing | 23 (37%)<br>28 (45%)<br>10 (16%)<br>1 (2%) | 27 (28%)<br>43 (45%)<br>25 (26%)<br>0    | 0.2093                                 |
| rs7755224 | AA<br>Aa<br>aa<br>missing | 48 (77%)<br>14 (23%)<br>0 (0%)<br>0        | 75 (79%)<br>18 (19%)<br>2 (2%)<br>0      | 0.9927                                 |
| rs2856683 | AA<br>Aa<br>aa<br>missing | 33 (53%)<br>22 (35%)<br>4 (6%)<br>3 (5%)   | 53 (56%)<br>34 (36%)<br>6 (6%)<br>2 (2%) | 0.7487                                 |
| rs7774434 | AA<br>Aa<br>aa<br>missing | 24 (39%)<br>27 (44%)<br>10 (16%)<br>1 (2%) | 33 (35%)<br>50 (53%)<br>12 (13%)<br>0    | 0.6408                                 |
| rs7775228 | AA<br>Aa<br>aa<br>missing | 47 (76%)<br>12 (19%)<br>2 (3%)<br>1 (2%)   | 68 (72%)<br>25 (26%)<br>1 (1%)<br>1 (1%) | 0.6964                                 |
| rs9275224 | AA<br>Aa<br>aa<br>missing | 27 (44%)<br>27 (44%)<br>8 (13%)<br>0       | 24 (25%)<br>51 (54%)<br>20 (21%)<br>0    | 0.0353                                 |
| rs5000634 | AA<br>Aa<br>aa<br>missing | 15 (24%)<br>30 (48%)<br>17 (27%)<br>0      | 34 (36%)<br>47 (49%)<br>14 (15%)<br>0    | 0.0783                                 |
| rs6457617 | AA<br>Aa<br>aa<br>missing | 25 (40%)<br>28 (45%)<br>9 (15%)<br>0       | 22 (23%)<br>53 (56%)<br>20 (21%)<br>0    | 0.0720                                 |
| rs2647012 | AA<br>Aa<br>aa            | 32 (52%)<br>25 (40%)<br>5 (8%)             | 39 (41%)<br>41 (43%)<br>15 (16%)         | 0.1900                                 |

|            |                           |                                           |                                          |        |
|------------|---------------------------|-------------------------------------------|------------------------------------------|--------|
|            | missing                   | 0                                         | 0                                        |        |
| rs9357152  | AA<br>Aa<br>aa<br>missing | 28 (45%)<br>28 (45%)<br>6 (10%)<br>0      | 50 (53%)<br>42 (44%)<br>3 (3%)<br>0      | 0.1753 |
| rs10484561 | AA<br>Aa<br>aa<br>missing | 48 (77%)<br>14 (23%)<br>0<br>0            | 75 (79%)<br>18 (19%)<br>2 (2%)<br>0      | 0.9927 |
| rs9275312  | AA<br>Aa<br>aa<br>missing | 39 (63%)<br>19 (31%)<br>4 (6%)<br>0       | 69 (73%)<br>23 (24%)<br>3 (3%)<br>0      | 0.2563 |
| rs9275313  | AA<br>Aa<br>aa<br>missing | 47 (76%)<br>15 (24%)<br>0<br>0            | 77 (81%)<br>13 (14%)<br>4 (4%)<br>1 (1%) | 0.7300 |
| rs1794282  | AA<br>Aa<br>aa<br>missing | 56 (90%)<br>6 (10%)<br>0<br>0             | 80 (84%)<br>15 (16%)<br>0<br>0           | 0.0745 |
| rs2856725  | AA<br>Aa<br>aa<br>missing | 30 (48%)<br>25 (40%)<br>5 (8%)<br>2 (3%)  | 39 (41%)<br>41 (43%)<br>15 (16%)<br>0    | 0.2735 |
| rs9275328  | AA<br>Aa<br>aa<br>missing | 37 (60%)<br>18 (29%)<br>4 (6%)<br>3 (5%)  | 67 (71%)<br>23 (24%)<br>3 (3%)<br>2 (2%) | 0.2648 |
| rs2647044  | AA<br>Aa<br>aa<br>missing | 50 (81%)<br>5 (8%)<br>1 (2%)<br>6 (10%)   | 66 (69%)<br>19 (20%)<br>7 (7%)<br>3 (3%) | 0.0052 |
| rs9275371  | AA<br>Aa<br>aa<br>missing | 28 (45%)<br>22 (35%)<br>7 (11%)<br>5 (8%) | 50 (53%)<br>36 (38%)<br>6 (6%)<br>3 (3%) | 0.4246 |
| rs9275374  | AA<br>Aa<br>aa<br>missing | 28 (45%)<br>27 (44%)<br>7 (11%)<br>0      | 50 (53%)<br>38 (40%)<br>6 (6%)<br>1 (1%) | 0.2951 |
| rs9275383  | AA<br>Aa<br>aa            | 43 (69%)<br>16 (26%)<br>0                 | 76 (80%)<br>16 (17%)<br>0                | 0.2721 |

|           |                           |                                      |                                          |        |
|-----------|---------------------------|--------------------------------------|------------------------------------------|--------|
|           | missing                   | 3 (5%)                               | 3 (3%)                                   |        |
| rs9275388 | AA<br>Aa<br>aa<br>missing | 28 (45%)<br>27 (44%)<br>7 (11%)<br>0 | 49 (52%)<br>39 (41%)<br>6 (6%)<br>1 (1%) | 0.3560 |
| rs9275390 | AA<br>Aa<br>aa<br>missing | 28 (45%)<br>27 (44%)<br>7 (11%)<br>0 | 50 (53%)<br>39 (41%)<br>6 (6%)<br>0      | 0.3206 |
| rs9275393 | AA<br>Aa<br>aa<br>missing | 28 (45%)<br>27 (44%)<br>7 (11%)<br>0 | 50 (53%)<br>39 (41%)<br>6 (6%)<br>0      | 0.3206 |
| rs2647050 | AA<br>Aa<br>aa<br>missing | 22 (35%)<br>32 (52%)<br>8 (13%)<br>0 | 38 (40%)<br>44 (46%)<br>13 (14%)<br>0    | 0.8345 |
| rs9275406 | AA<br>Aa<br>aa<br>missing | 28 (45%)<br>27 (44%)<br>7 (11%)<br>0 | 50 (53%)<br>39 (41%)<br>6 (6%)<br>0      | 0.3206 |
| rs2858308 | AA<br>Aa<br>aa<br>missing | 54 (87%)<br>8 (13%)<br>0<br>0        | 74 (78%)<br>20 (21%)<br>1 (1%)<br>0      | 0.0995 |
| rs9275407 | AA<br>Aa<br>aa<br>missing | 28 (45%)<br>27 (44%)<br>7 (11%)<br>0 | 50 (53%)<br>38 (40%)<br>6 (6%)<br>1 (1%) | 0.2951 |
| rs9275418 | AA<br>Aa<br>aa<br>missing | 29 (47%)<br>26 (42%)<br>7 (11%)<br>0 | 50 (53%)<br>39 (41%)<br>6 (6%)<br>0      | 0.4338 |
| rs2856718 | AA<br>Aa<br>aa<br>missing | 22 (35%)<br>32 (52%)<br>8 (13%)<br>0 | 38 (40%)<br>44 (46%)<br>13 (14%)<br>0    | 0.8345 |
| rs2856717 | AA<br>Aa<br>aa<br>missing | 32 (52%)<br>25 (40%)<br>5 (8%)<br>0  | 40 (42%)<br>41 (43%)<br>14 (15%)<br>0    | 0.2533 |
| rs2858305 | AA<br>Aa<br>aa            | 32 (52%)<br>25 (40%)<br>5 (8%)       | 40 (42%)<br>41 (43%)<br>14 (15%)         | 0.2533 |

|            |                           |                                           |                                          |        |
|------------|---------------------------|-------------------------------------------|------------------------------------------|--------|
|            | missing                   | 0                                         | 0                                        |        |
| rs9275424  | AA<br>Aa<br>aa<br>missing | 26 (42%)<br>25 (40%)<br>7 (11%)<br>4 (6%) | 49 (52%)<br>39 (41%)<br>6 (6%)<br>1 (1%) | 0.2810 |
| rs9275425  | AA<br>Aa<br>aa<br>missing | 28 (45%)<br>26 (42%)<br>7 (11%)<br>1 (2%) | 50 (53%)<br>39 (41%)<br>6 (6%)<br>0      | 0.3498 |
| rs9275427  | AA<br>Aa<br>aa<br>missing | 28 (45%)<br>27 (44%)<br>7 (11%)<br>0      | 50 (53%)<br>39 (41%)<br>6 (6%)<br>0      | 0.3206 |
| rs2856705  | AA<br>Aa<br>aa<br>missing | 54 (87%)<br>8 (13%)<br>0<br>0             | 74 (78%)<br>19 (20%)<br>1 (1%)<br>1 (1%) | 0.1323 |
| rs9275428  | AA<br>Aa<br>aa<br>missing | 28 (45%)<br>27 (44%)<br>7 (11%)<br>0      | 50 (53%)<br>39 (41%)<br>6 (6%)<br>0      | 0.3206 |
| rs13192471 | AA<br>Aa<br>aa<br>missing | 42 (68%)<br>17 (27%)<br>3 (5%)<br>0       | 67 (71%)<br>26 (27%)<br>2 (2%)<br>0      | 0.4603 |
| rs1794275  | AA<br>Aa<br>aa<br>missing | 40 (65%)<br>15 (24%)<br>5 (8%)<br>2 (3%)  | 62 (65%)<br>28 (29%)<br>3 (3%)<br>2 (2%) | 0.5559 |
| rs9275439  | AA<br>Aa<br>aa<br>missing | 28 (45%)<br>27 (44%)<br>7 (11%)<br>0      | 50 (53%)<br>39 (41%)<br>5 (5%)<br>1 (1%) | 0.2770 |



**Supplementary Table 1B. Genotype counts and frequencies of SNPs within IL6**

| SNP        | Alleles                   | Spontaneous Resolution<br>n = 62      | Chronic HCV Infection<br>n = 95       | Logistic Regression Unadjusted p-value |
|------------|---------------------------|---------------------------------------|---------------------------------------|----------------------------------------|
| rs2961285  | AA<br>Aa<br>aa<br>missing | 18 (29%)<br>33 (53%)<br>11 (18%)<br>0 | 28 (29%)<br>43 (45%)<br>24 (25%)<br>0 | 0.6558                                 |
| rs7793163  | AA<br>Aa<br>aa<br>missing | 49 (79%)<br>13 (21%)<br>0<br>0        | 74 (78%)<br>18 (19%)<br>(3 (3%)<br>(0 | 0.9107                                 |
| rs12535797 | AA<br>Aa<br>aa<br>missing | 55 (89%)<br>7 (11%)<br>0<br>0         | 78 (82%)<br>14 (15%)<br>1 (1%)<br>2   | 0.1637                                 |
| rs4722164  | AA<br>Aa<br>aa<br>missing | 48 (77%)<br>13 (21%)<br>1 (2%)<br>0   | 74 (78%)<br>18 (19%)<br>3 (3%)<br>0   | 0.6217                                 |
| rs2961294  | AA<br>Aa<br>aa<br>missing | 16 (26%)<br>31 (50%)<br>15 (24%)<br>0 | 29 (31%)<br>41 (43%)<br>25 (26%)<br>0 | 0.1737                                 |
| rs1989838  | AA<br>Aa<br>aa<br>missing | 27 (44%)<br>28 (45%)<br>7 (11%)<br>0  | 49 (52%)<br>40 (42%)<br>6 (6%)<br>0   | 0.1696                                 |
| rs2905321  | AA<br>Aa<br>aa<br>missing | 17 (27%)<br>31 (50%)<br>14 (23%)<br>0 | 31 (33%)<br>37 (39%)<br>27 (28%)<br>0 | 0.4200                                 |
| rs2905325  | AA<br>Aa<br>aa<br>missing | 53 (85%)<br>9 (15%)<br>0<br>0         | 77 (81%)<br>15 (16%)<br>3 (3%)<br>0   | 0.6346                                 |
| rs4719709  | AA<br>Aa<br>aa<br>missing | 33 (53%)<br>26 (42%)<br>3 (5%)<br>0   | 46 (48%)<br>42 (44%)<br>7 (7%)<br>0   | 0.1936                                 |

|            |                           |                                       |                                       |        |
|------------|---------------------------|---------------------------------------|---------------------------------------|--------|
| rs13225099 | AA<br>Aa<br>aa<br>missing | 37 (60%)<br>22 (35%)<br>3 (5%)<br>0   | 50 (53%)<br>39 (41%)<br>6 (6%)<br>0   | 0.2727 |
| rs1476482  | AA<br>Aa<br>aa<br>missing | 47 (76%)<br>12 (19%)<br>3 (5%)<br>0   | 63 (66%)<br>25 (26%)<br>7 (7%)<br>0   | 0.6964 |
| rs1476483  | AA<br>Aa<br>aa<br>missing | 48 (77%) (<br>13 (21%)<br>1 (2%)<br>0 | 63 (66%)<br>31 (33%)<br>1 (1%)<br>0   | 0.0927 |
| rs2106549  | AA<br>Aa<br>aa<br>missing | 54 (87%)<br>8 (13%)<br>0<br>0         | 78 (82%)<br>13 (14%)<br>3 (3%)<br>1   | 0.5406 |
| rs7802442  | AA<br>Aa<br>aa<br>missing | 25 (40%)<br>31 (50%)<br>6 (10%)<br>0  | 30 (32%)<br>41 (43%)<br>24 (25%)<br>0 | 0.2925 |
| rs4722166  | AA<br>Aa<br>aa<br>missing | 40 (65%)<br>20 (32%)<br>2 (3%)<br>0   | 51 (54%)<br>37 (39%)<br>7 (7%)<br>0   | 0.0137 |
| rs6949149  | AA<br>Aa<br>aa<br>missing | 48 (77%)<br>13 (21%)<br>1 (2%)<br>0   | 77 (81%)<br>15 (16%)<br>3 (3%)<br>0   | 0.4693 |
| rs6954897  | AA<br>Aa<br>aa<br>missing | 26 (42%)<br>32 (52%)<br>4 (6%)<br>0   | 36 (38%)<br>41 (43%)<br>18 (19%)<br>0 | 0.0063 |
| rs6946864  | AA<br>Aa<br>aa<br>missing | 23 (37%)<br>29 (47%)<br>10 (16%)<br>0 | 47 (49%)<br>28 (29%)<br>20 (21%)<br>0 | 0.0144 |
| rs10156056 | AA<br>Aa<br>aa<br>missing | 37 (60%)<br>23 (37%)<br>1 (2%)<br>1   | 68 (72%)<br>25 (26%)<br>2 (2%)<br>0   | 0.0849 |

|            |                           |                                       |                                       |        |
|------------|---------------------------|---------------------------------------|---------------------------------------|--------|
| rs7776857  | AA<br>Aa<br>aa<br>missing | 42 (68%)<br>18 (29%)<br>2 (3%)<br>0   | 55 (58%)<br>34 (36%)<br>6 (6%)<br>0   | 0.0146 |
| rs7801617  | AA<br>Aa<br>aa<br>missing | 35 (56%)<br>25 (40%)<br>2 (3%)<br>0   | 66 (69%)<br>22 (23%)<br>7 (7%)<br>0   | 0.0592 |
| rs7805828  | AA<br>Aa<br>aa<br>missing | 22 (35%)<br>28 (45%)<br>12 (19%)<br>0 | 34 (36%)<br>45 (47%)<br>16 (17%)<br>0 | 0.9531 |
| rs1880242  | AA<br>Aa<br>aa<br>missing | 26 (42%)<br>30 (48%)<br>6 (10%)<br>0  | 36 (38%)<br>44 (46%)<br>15 (16%)<br>0 | 0.0973 |
| rs10499563 | AA<br>Aa<br>aa<br>missing | 30 (48%)<br>30 (48%)<br>2 (3%)<br>0   | 55 (58%)<br>33 (35%)<br>7 (7%)<br>0   | 0.5727 |
| rs2056576  | AA<br>Aa<br>aa<br>missing | 24 (39%)<br>32 (52%)<br>6 (10%)<br>0  | 42 (44%)<br>46 (48%)<br>7 (7%)<br>0   | 0.4245 |
| rs2069837  | AA<br>Aa<br>aa<br>missing | 47 (76%)<br>15 (24%)<br>0<br>0        | 78 (82%)<br>15 (16%)<br>2 (2%)<br>0   | 0.4317 |
| rs2066992  | AA<br>Aa<br>aa<br>missing | 48 (77%)<br>14 (23%)<br>0<br>0        | 77 (81%)<br>17 (18%)<br>1 (1%)<br>0   | 0.5638 |
| rs1554606  | AA<br>Aa<br>aa<br>missing | 31 (50%)<br>27 (44%)<br>4 (6%)<br>0   | 36 (38%)<br>46 (48%)<br>13 (14%)<br>0 | 0.0426 |
| rs10242595 | AA<br>Aa<br>aa<br>missing | 15 (24%)<br>32 (52%)<br>15 (24%)<br>0 | 44 (46%)<br>33 (35%)<br>17 (18%)<br>1 | 0.0017 |

|            |                           |                                       |                                       |        |
|------------|---------------------------|---------------------------------------|---------------------------------------|--------|
| rs11766273 | AA<br>Aa<br>aa<br>missing | 58 (94%)<br>4 (6%)<br>0<br>0          | 85 (89%)<br>10 (11%)<br>0<br>0        | 0.2311 |
| rs7802277  | AA<br>Aa<br>aa<br>missing | 29 (47%)<br>27 (44%)<br>6 (10%)<br>0  | 65 (68%)<br>23 (24%)<br>7 (7%)<br>0   | 0.0093 |
| rs7801406  | AA<br>Aa<br>aa<br>missing | 39 (63%)<br>21 (34%)<br>2 (3%)<br>0   | 50 (53%)<br>36 (38%)<br>9 (9%)<br>0   | 0.0030 |
| rs6461666  | AA<br>Aa<br>aa<br>missing | 26 (42%)<br>25 (40%)<br>11 (18%)<br>0 | 51 (54%)<br>34 (36%)<br>10 (11%)<br>0 | 0.0166 |
| rs6461667  | AA<br>Aa<br>aa<br>missing | 39 (63%)<br>21 (34%)<br>2 (3%)<br>0   | 50 (53%)<br>36 (38%)<br>9 (9%)<br>0   | 0.0030 |
| rs4722178  | AA<br>Aa<br>aa<br>missing | 24 (39%)<br>28 (45%)<br>9 (15%)<br>1  | 15 (16%)<br>53 (56%)<br>26 (27%)<br>1 | 0.0047 |
| rs10229203 | AA<br>Aa<br>aa<br>missing | 41 (66%)<br>20 (32%)<br>1 (2%)<br>0   | 80 (84%)<br>12 (13%)<br>3 (3%)<br>0   | 0.0199 |
| rs10229457 | AA<br>Aa<br>aa<br>missing | 16 (26%)<br>29 (47%)<br>17 (27%)<br>0 | 38 (40%)<br>32 (34%)<br>25 (26%)<br>0 | 0.0109 |
| rs7796691  | AA<br>Aa<br>aa<br>missing | 31 (50%)<br>26 (42%)<br>5 (8%)<br>0   | 73 (77%)<br>19 (20%)<br>3 (3%)<br>0   | 0.0013 |
| rs7782803  | AA<br>Aa<br>aa<br>missing | 47 (76%)<br>14 (23%)<br>1 (2%)<br>0   | 64 (67%)<br>24 (25%)<br>7 (7%)<br>0   | 0.6511 |

|            |                           |                                       |                                       |        |
|------------|---------------------------|---------------------------------------|---------------------------------------|--------|
| rs7793526  | AA<br>Aa<br>aa<br>missing | 20 (32%)<br>29 (47%)<br>13 (21%)<br>0 | 47 (49%)<br>38 (40%)<br>10 (11%)<br>0 | 0.0724 |
| rs1608555  | AA<br>Aa<br>aa<br>missing | 20 (32%)<br>26 (42%)<br>15 (24%)<br>1 | 46 (48%)<br>37 (39%)<br>10 (11%)<br>2 | 0.0473 |
| rs10950917 | AA<br>Aa<br>aa<br>missing | 38 (61%)<br>21 (34%)<br>3 (5%)<br>0   | 48 (51%)<br>38 (40%)<br>9 (9%)<br>0   | 0.0653 |

**Supplementary Table 1C. Genotype counts and frequencies of SNPs within IL28B**

| <b>SNP</b> | <b>Alleles</b>            | <b>Spontaneous Resolution<br/>n = 62</b>  | <b>Chronic HCV Infection<br/>n = 95</b> | <b>Logistic Regression Unadjusted p-value</b> |
|------------|---------------------------|-------------------------------------------|-----------------------------------------|-----------------------------------------------|
| rs12972991 | AA<br>Aa<br>aa<br>missing | 46 (74%)<br>15 (24%)<br>1 (2%)<br>0       | 59 (62%)<br>30 (32%)<br>6 (6%)<br>0     | 0.0206                                        |
| rs12979860 | AA<br>Aa<br>aa<br>missing | 34 (55%)<br>20 (32%)<br>6 (10%)<br>2 (3%) | 32 (34%)<br>47 (49%)<br>16 (17%)<br>0   | 0.0896                                        |
| rs12980275 | AA<br>Aa<br>aa<br>missing | 35 (56%)<br>22 (35%)<br>5 (8%)<br>0       | 31 (33%)<br>47 (49%)<br>17 (18%)<br>0   | 0.0324                                        |
| rs8099917  | AA<br>Aa<br>aa<br>missing | 49 (79%)<br>11 (18%)<br>2 (3%)<br>0       | 71 (75%)<br>21 (22%)<br>3 (3%)<br>0     | 0.2826                                        |

**Supplementary Table 2. Step-down permutation testing applied to univariate analyses of 150 SNPs:  $p$ -values and 5% significance thresholds derived from permutation distributions.**

| Gene Name | SNP Name   | $p$ -value  | 5% Significance Threshold |
|-----------|------------|-------------|---------------------------|
| IL6       | rs7796691  | 0.001295594 | 0.000424816               |
|           | rs10242595 | 0.001658856 | 0.001998481               |
|           | rs7801406  | 0.002951262 | 0.003353515               |
|           | rs6461667  | 0.002951262 | 0.005798252               |
|           | rs4722178  | 0.00471515  | 0.008469925               |
| HLA-DQB1  | rs2647044  | 0.005179592 | 0.010640514               |
| IL6       | rs6954897  | 0.0062929   | 0.013691308               |
|           | rs7802277  | 0.009344    | 0.016350194               |
|           | rs10229457 | 0.010906335 | 0.019724857               |
|           | rs4722166  | 0.013709627 | 0.022196036               |
|           | rs6946864  | 0.014424173 | 0.025133073               |
|           | rs7776857  | 0.014585638 | 0.028587283               |
|           | rs6461666  | 0.016597254 | 0.03290528                |
|           | rs10229203 | 0.019889686 | 0.036009737               |
| IL28B     | rs12972991 | 0.020637531 | 0.037851262               |
| IL10      | rs4072226  | 0.025948728 | 0.04179366                |
| IL28B     | rs12980275 | 0.032370623 | 0.046516024               |
| HLA-DQB1  | rs9275224  | 0.035265809 | 0.049985218               |
| IL6       | rs1554606  | 0.042552004 | 0.053198974               |
|           | rs1608555  | 0.04733872  | 0.055736244               |
|           | rs7801617  | 0.059222031 | 0.060487771               |
|           | rs10950917 | 0.065254838 | 0.064963748               |
| IFNG      | rs7300500  | 0.069176604 | 0.067961175               |
| HLA-DQB1  | rs6457617  | 0.07198693  | 0.071236136               |
| IL6       | rs7793526  | 0.07239997  | 0.075657335               |
| HLA-DQB1  | rs1794282  | 0.07452235  | 0.081084643               |
| SOCS3     | rs9904782  | 0.07572546  | 0.082480017               |
| HLA-DQB1  | rs5000634  | 0.078266814 | 0.088253296               |
| IL6       | rs10156056 | 0.084928299 | 0.094930399               |
| IL28B     | rs1297986  | 0.089619078 | 0.096806374               |
| IL6       | rs1476483  | 0.092702583 | 0.101076642               |
|           | rs1880242  | 0.097253147 | 0.104670071               |
| HLA-DQB1  | rs2858308  | 0.099463921 | 0.109041357               |
|           | rs2856705  | 0.132304898 | 0.115149252               |
| IL10      | rs1800896  | 0.141556585 | 0.120188111               |

|          |            |             |             |
|----------|------------|-------------|-------------|
| HLA-DRB1 | rs2858870  | 0.152846222 | 0.124542626 |
| IL6      | rs12535797 | 0.163707402 | 0.128573644 |
| IL10     | rs3024490  | 0.168290547 | 0.133058213 |
| IL6      | rs1989838  | 0.169551692 | 0.140056139 |
|          | rs2961294  | 0.173689338 | 0.143520418 |
| HLA-DQB1 | rs9357152  | 0.175292647 | 0.148806491 |
|          | rs2647012  | 0.189971106 | 0.153859061 |
| IL6      | rs4719709  | 0.193559811 | 0.158835489 |
| IL10     | rs3024498  | 0.194293291 | 0.16526242  |
| HLA-DQB1 | rs9275141  | 0.209292633 | 0.170365376 |
| IL10     | rs2222202  | 0.215392829 | 0.175996641 |
| IL6      | rs11766273 | 0.231060255 | 0.182991836 |
| IL10     | rs4072227  | 0.235401961 | 0.18929008  |
| HLA-DQB1 | rs2856717  | 0.253339991 | 0.195643162 |
|          | rs2858305  | 0.253339991 | 0.201414165 |
|          | rs9275312  | 0.25628026  | 0.206559346 |
|          | rs9275328  | 0.264821022 | 0.215186952 |
|          | rs9275383  | 0.272062539 | 0.220995039 |
| IL6      | rs13225099 | 0.27272189  | 0.22599771  |
| HLA-DQB1 | rs2856725  | 0.273487607 | 0.233012139 |
|          | rs9275439  | 0.277021557 | 0.238032872 |
| HLA-DRB1 | rs532098   | 0.280665473 | 0.243465492 |
| HLA-DQB1 | rs9275424  | 0.281049773 | 0.250054    |
| IL28B    | rs8099917  | 0.282593607 | 0.255983217 |
| IL10     | rs6692511  | 0.284413374 | 0.258247737 |
| IFNG     | rs2069727  | 0.290727497 | 0.263896557 |
| IL6      | rs7802442  | 0.292531693 | 0.270086689 |
| HLA-DQB1 | rs9275374  | 0.295051663 | 0.276904216 |
|          | rs9275407  | 0.295051663 | 0.28363915  |
| IFNG     | rs2069716  | 0.304227598 | 0.289563808 |
| HLA-DQB1 | rs9275390  | 0.320561531 | 0.29256828  |
|          | rs9275393  | 0.320561531 | 0.298895928 |
|          | rs9275406  | 0.320561531 | 0.310345206 |
|          | rs9275427  | 0.320561531 | 0.318043853 |
|          | rs9275428  | 0.320561531 | 0.326169435 |
| SOCS3    | rs4969170  | 0.326312938 | 0.329998686 |
| IL10     | rs1554286  | 0.338019606 | 0.337286673 |
| CTLA4    | rs10197319 | 0.339650595 | 0.343004728 |
| HLA-DQB1 | rs9275425  | 0.349774133 | 0.351130007 |
| CTLA4    | rs231757   | 0.353991648 | 0.355875747 |



|          |            |             |             |
|----------|------------|-------------|-------------|
| HLA-DQB1 | rs9275388  | 0.355970967 | 0.362527245 |
| CTLA4    | rs3096851  | 0.384889529 | 0.372029815 |
| TGFB1    | rs4803455  | 0.390065937 | 0.379657177 |
| IFNG     | rs12318069 | 0.406925443 | 0.385307332 |
| IL18     | rs11214093 | 0.407891769 | 0.393303321 |
| TGFB1    | rs8110090  | 0.419548538 | 0.397513853 |
| IL6      | rs2905321  | 0.420016363 | 0.40541972  |
| HLA-DRB1 | rs477515   | 0.420887157 | 0.414301491 |
| IL6      | rs2056576  | 0.424503234 | 0.419976456 |
| HLA-DQB1 | rs9275371  | 0.424606885 | 0.426766822 |
| TGFB1    | rs2241715  | 0.428948349 | 0.433463862 |
| IL6      | rs2069837  | 0.431703257 | 0.437437397 |
| HLA-DQB1 | rs9275418  | 0.433766926 | 0.447072476 |
| SOCS3    | rs7221341  | 0.437658958 | 0.453255839 |
| HLA-DQB1 | rs13192471 | 0.460255346 | 0.463080741 |
| HLA-DRB1 | rs2516049  | 0.464577715 | 0.470253348 |
| IL6      | rs6949149  | 0.469292213 | 0.474381917 |
| SOCS1    | rs243324   | 0.493153314 | 0.484426413 |
| IFNG     | rs2069718  | 0.496412743 | 0.490868931 |
| CTLA4    | rs3116504  | 0.507763054 | 0.497425146 |
| SOCS3    | rs4447485  | 0.508406434 | 0.505689156 |
|          | rs4969168  | 0.512972802 | 0.513962975 |
|          | rs9914220  | 0.532129163 | 0.522385758 |
| IL18     | rs2043055  | 0.539877906 | 0.530759541 |
| IL6      | rs2106549  | 0.540614244 | 0.538492717 |
| SOCS3    | rs4789576  | 0.545021779 | 0.545641147 |
| HLA-DQB1 | rs1794275  | 0.555916178 | 0.554401401 |
| IL6      | rs2066992  | 0.563800812 | 0.563711963 |
| IL10     | rs4844553  | 0.570641513 | 0.569465272 |
| IL6      | rs10499563 | 0.57268103  | 0.575826026 |
| SOCS3    | rs16971055 | 0.580789343 | 0.581624466 |
|          | rs9915291  | 0.582768762 | 0.590312662 |
| HLA-DQB1 | rs1063355  | 0.611184732 | 0.597061569 |
| IL6      | rs4722164  | 0.621693163 | 0.605862865 |
| SOCS3    | rs9905081  | 0.630302034 | 0.613657187 |
| IL6      | rs2905325  | 0.634573224 | 0.62049716  |
| HLA-DQB1 | rs7774434  | 0.640764277 | 0.630613706 |
| IL6      | rs7782803  | 0.651091034 | 0.638288526 |
| IL10     | rs13376708 | 0.654430951 | 0.648340073 |
| IL6      | rs2961285  | 0.655752635 | 0.657353009 |

|          |            |             |             |
|----------|------------|-------------|-------------|
| SOCS3    | rs17642091 | 0.665249848 | 0.663802448 |
|          | rs4444401  | 0.683760745 | 0.670864932 |
| IL6      | rs1476482  | 0.696422869 | 0.67766323  |
| HLA-DQB1 | rs7775228  | 0.696424945 | 0.685993901 |
| TNF      | rs3093662  | 0.704348534 | 0.692355233 |
| HLA-DQB1 | rs9275313  | 0.729966945 | 0.702326267 |
|          | rs2856683  | 0.748742325 | 0.711597997 |
| SOCS3    | rs4789588  | 0.750951037 | 0.723150481 |
| IFNG     | rs12312186 | 0.761198009 | 0.730423781 |
| SOCS3    | rs4789577  | 0.773013808 | 0.736548142 |
| HLA-DRB1 | rs660895   | 0.780978726 | 0.746366369 |
| IL18     | rs243908   | 0.795416049 | 0.755026112 |
| IL10     | rs3024505  | 0.800648674 | 0.763840575 |
| IL18     | rs10891323 | 0.817008557 | 0.769688318 |
| IFNG     | rs3181032  | 0.818646628 | 0.778861619 |
| HLA-DQB1 | rs2647050  | 0.83450225  | 0.786700311 |
|          | rs2856718  | 0.83450225  | 0.795327495 |
| IL18     | rs1946518  | 0.850037602 | 0.805072943 |
| SOCS3    | rs8074003  | 0.851126633 | 0.816250043 |
| SOCS1    | rs193779   | 0.85301645  | 0.825070093 |
| IL10     | rs1800894  | 0.855939093 | 0.834437819 |
| CTLA4    | rs733618   | 0.875491412 | 0.845638403 |
| IL10     | rs3021094  | 0.900520058 | 0.855876601 |
| IL6      | rs7793163  | 0.910673973 | 0.862996257 |
| SOCS3    | rs11651398 | 0.917219397 | 0.873108087 |
| IL10     | rs6686931  | 0.919245025 | 0.881948512 |
| IL18     | rs795467   | 0.923049199 | 0.890637866 |
| IL10     | rs3024509  | 0.928900221 | 0.899320486 |
| CTLA4    | rs10497873 | 0.94141377  | 0.911675151 |
| IL6      | rs7805828  | 0.953115634 | 0.922470488 |
| CTLA4    | rs231726   | 0.966849098 | 0.932431744 |
| TGFB1    | rs8179181  | 0.979473716 | 0.940172394 |
| IFNG     | rs12369470 | 0.980717153 | 0.953292253 |
| HLA-DQB1 | rs7755224  | 0.992717878 | 0.96519939  |
|          | rs10484561 | 0.992717878 | 0.979146292 |
